# Supplementary material
Source: publisher figshare collection journal article supplement (https://acs.figshare.com/ndownloader/files/4288861)

Supplementary Figure 1. Related to Figure 2.

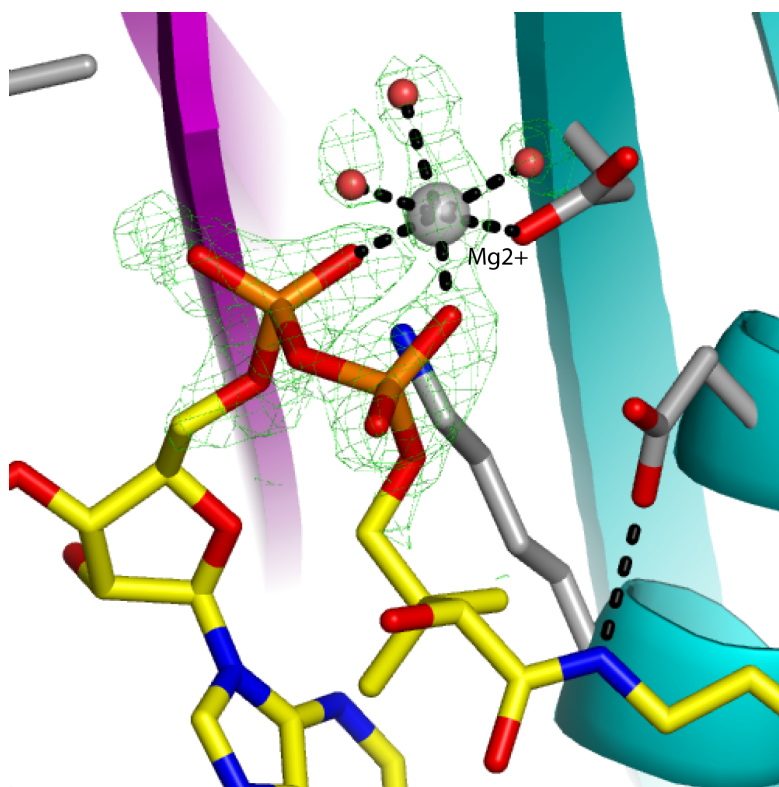

Supplementary Figure S1, associated with Table 3.

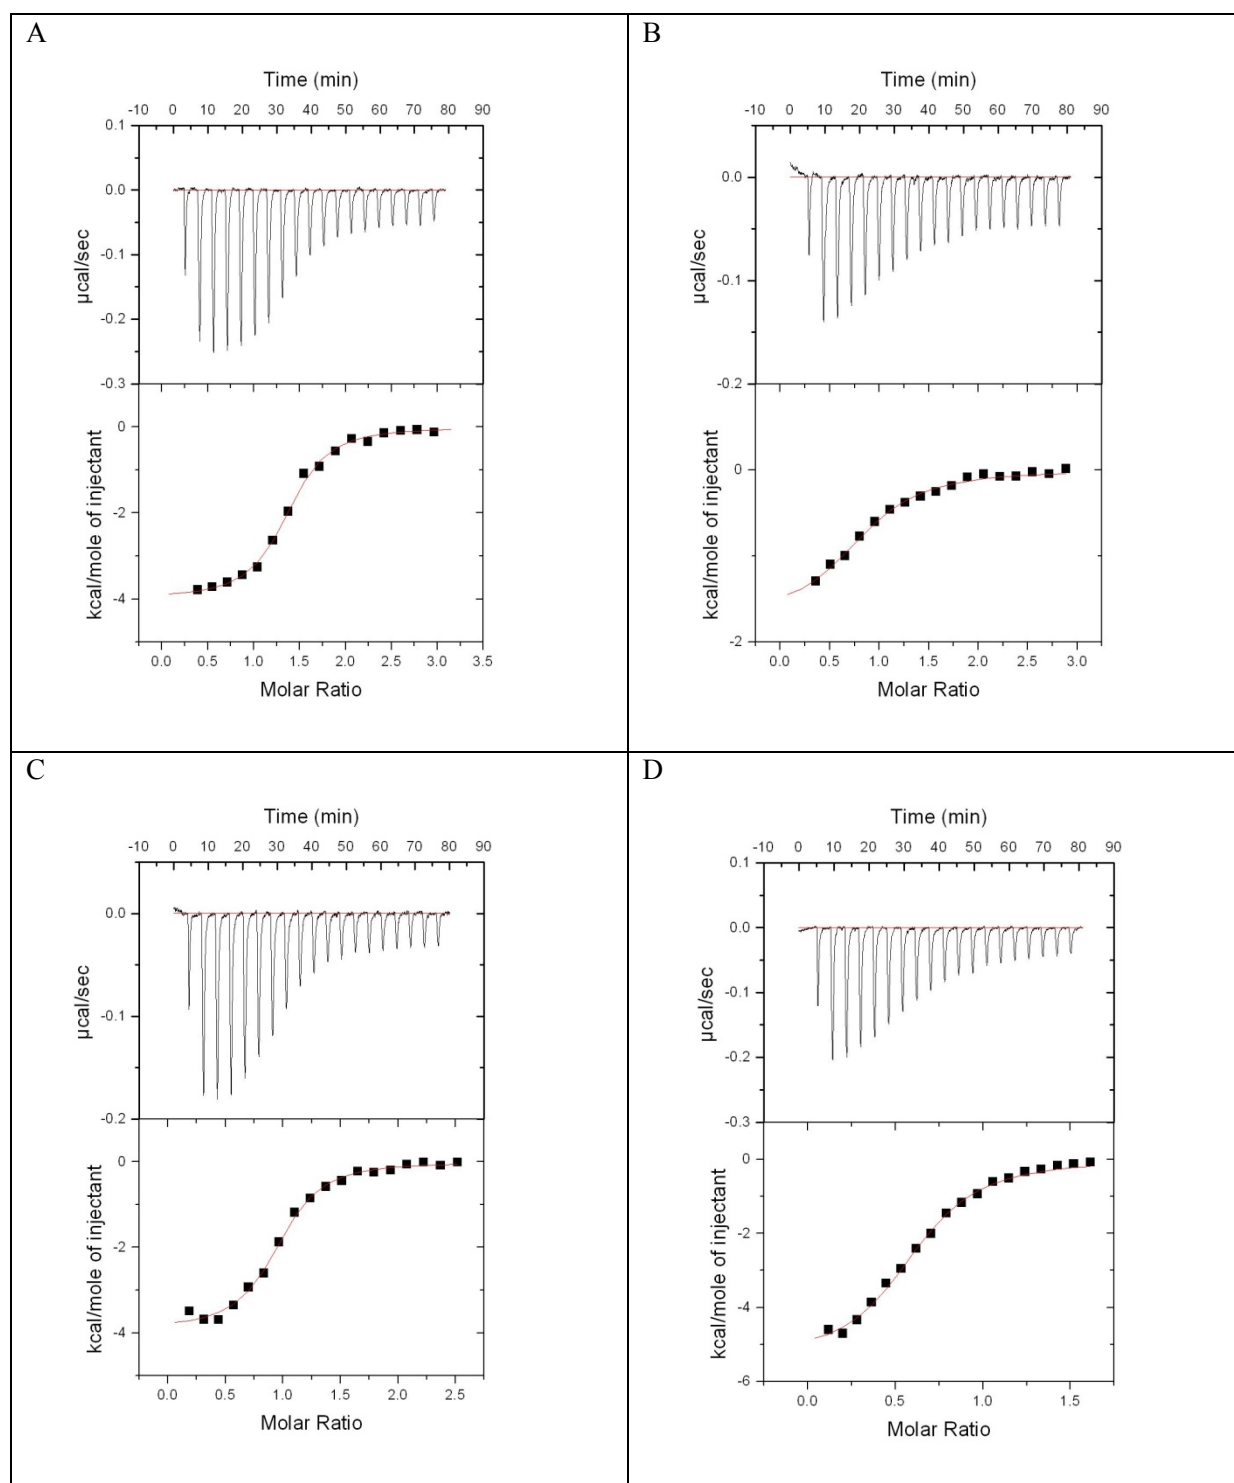

Supplement: Supplementary file 1 [file 4288861]
